# Supplementary material for: Circulating Neutrophil Profiles Undergo a Dynamic Shift during Metabolic Dysfunction-Associated Steatohepatitis (MASH) Progression
Source: MDPI journal article supplement (doi:10.3390/biomedicines12051105), 2024-05-16
Supplement: s1 [file s1]

*Article*

# **Circulating Neutrophil Profiles Undergo a Dynamic Shift during Metabolic Dysfunction-Associated Steatohepatitis (MASH) Progression**

**Ana C. Maretta-Mira <sup>1,\*</sup>, Matthew P. Salomon <sup>1</sup>, Shefali Chopra <sup>2</sup>, Liyun Yuan <sup>1</sup> and Lucy Golden-Mason <sup>1</sup>**

<sup>1</sup> USC Research Center for Liver Diseases, Division of Gastrointestinal and Liver Diseases, Department of Medicine, Keck School of Medicine, University of Southern California, Los Angeles, CA 90033, USA; msalomon@usc.edu (M.P.S.); lyuan@med.usc.edu (L.Y.); lucy.golden@med.usc.edu (L.G.-M.)

<sup>2</sup> Department of Pathology, Keck School of Medicine, University of Southern California, Los Angeles, CA 90033, USA; shefali.chopra@med.usc.edu

\* Correspondence: maretta@usc.edu

## **Supplementary Figures**

### **Content List:**

Supplemental Figure 1

Supplemental Figure 2

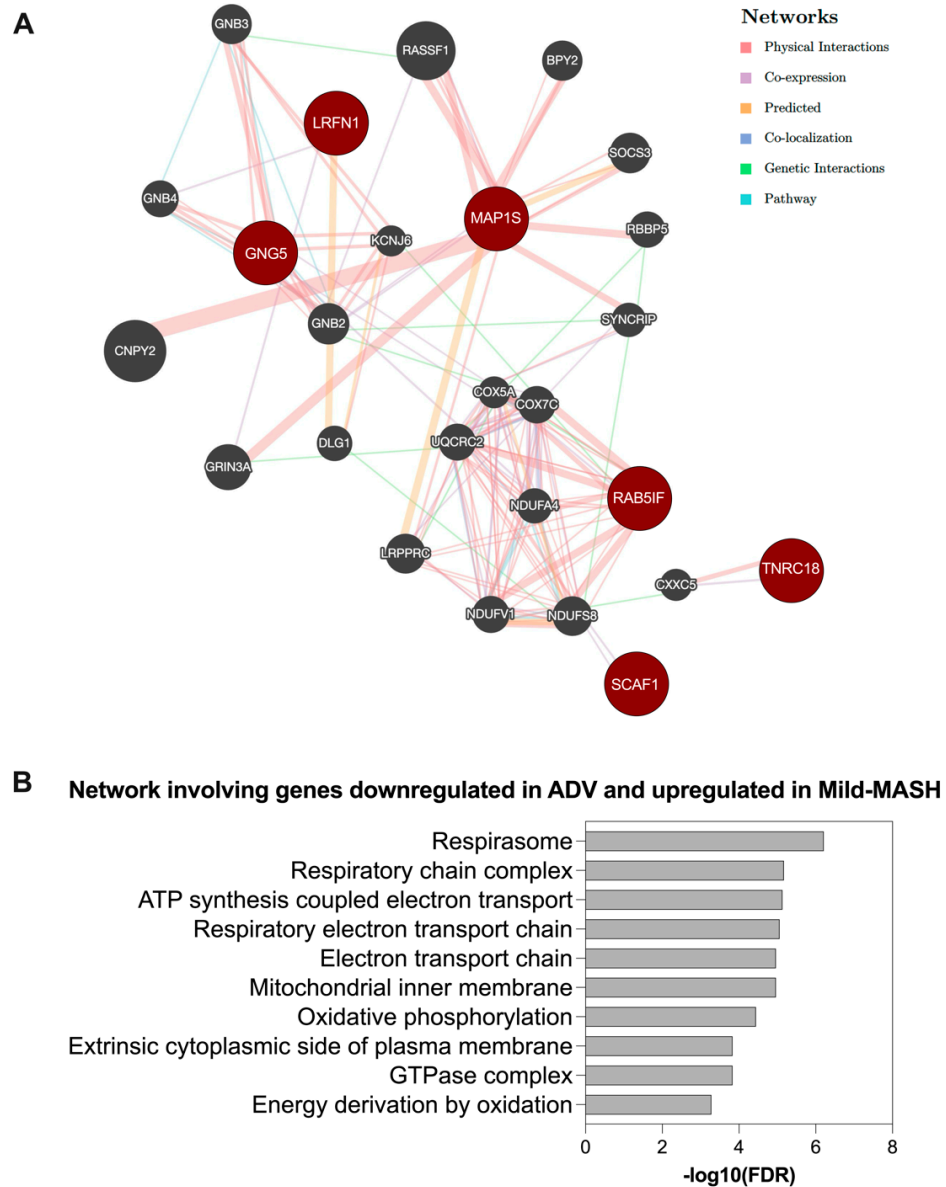

**Figure S1.** Identification of genes that shift expression in neutrophils from mild to advanced MASH patients. **(A)** Network analysis using GeneMANIA showed that from the 9 genes identified in our dataset, 6 genes are part of a larger network. Legend indicates the type of connection among the genes. **(B)** Pathway enrichment of genes involved in the network from Figure A.

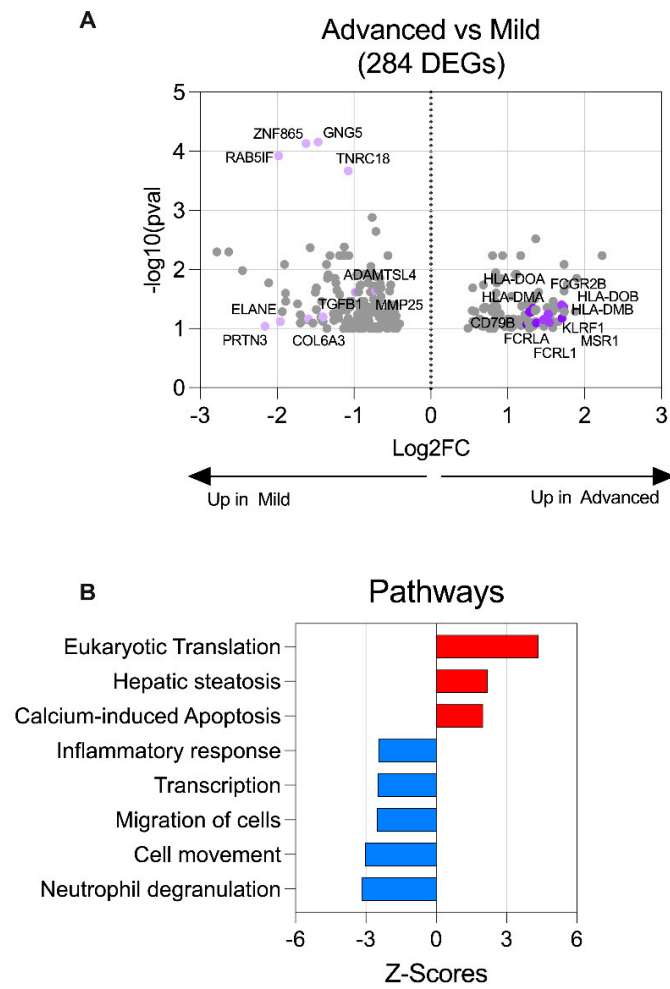

**Figure S2.** Direct comparison between advanced and mild MASH. **(A)** Volcano plot showing the differentially expressed genes obtained from statistical comparison of advanced and mild transcriptome groups. Arrow to the left: genes upregulated in Mild x Adv. Arrow to the right: genes upregulated in Adv x Mild. **(B)** Pathways enrichment analysis showing pathways upregulated in Mild x Adv (blue) and Adv x Mild (red).
